# Supplementary material for: Pectic oligosaccharides ameliorate high-fat diet-induced obesity and hepatic steatosis in association with modulating gut microbiota in mice
Source: Royal Society of Chemistry journal article supplement (doi:10.1039/d3fo02168h), 2023-01-01
Supplement: d3fo02168h1.pdf [file d3fo02168h1.pdf]

**Table S1 Ingredient composition of the experimental diets.**

|                                      | <b>NCD</b> | <b>HFD</b> |
|--------------------------------------|------------|------------|
| Carbohydrate (% of energy)           | 64.00      | 20.00      |
| Protein (% of energy)                | 20.00      | 20.00      |
| Fat (% of energy)                    | 7.00       | 60.00      |
| Energy (kcal/kg)                     | 4000.00    | 5240.00    |
| <b>Ingredient, g/kg</b>              |            |            |
| Casein (form milk)                   | 200.00     | 200.00     |
| Corn starch                          | 397.49     | 0.00       |
| Maltodextrin 10                      | 0.00       | 125.00     |
| Sucrose                              | 100.00     | 68.8       |
| Dextrose                             | 132.00     | 0.00       |
| Cellulose                            | 50.00      | 50.00      |
| Soybean oil                          | 70.00      | 25.00      |
| Mineral mixture                      | 35.00      | 10.00      |
| Vitamin mixture                      | 10.00      | 10.00      |
| TBHQ                                 | 0.01       | 0.00       |
| DL -Methionine                       | 0.00       | 0.00       |
| L -Cystine                           | 3.00       | 3.00       |
| Calcium carbonate                    | 0.00       | 5.50       |
| Cholesterol                          | 0.00       | 0.00       |
| Choline bitartrate                   | 2.50       | 2.00       |
| Chokeberry powder                    | 0.00       | 0.00       |
| DiCalcium Phosphate                  | 0.00       | 13.00      |
| Calcium Carbonate                    | 0.00       | 5.50       |
| Potassium Citrate, 1H <sub>2</sub> O | 0.00       | 16.50      |
| Lord                                 | 0.00       | 245.00     |

**Table S2. The primers sequences used for PCR reaction.**

| Gene name                       | Primer's sequence                                        |
|---------------------------------|----------------------------------------------------------|
| <i>GAPDH</i>                    | F:GGTTGTCTCCTGCGACTTCA<br>R:TGGTCCAGGGTTTCTTACTCC        |
| <i>IL-10</i>                    | F:GGTTGTCGTCTCATTCTGAAAGA<br>R:GGTAGAGGACCCAAGTTCGTTAAGA |
| <i>IL-6</i>                     | F:CTTCTTGGGACTGATGCTGGTGAC<br>R:AGGTCTGTTGGGAGTGGTATCCTC |
| <i>TNF<math>\alpha</math></i>   | F:ATGTCTCAGCCTCTTCTCATTC<br>R:GCTTGTCACTCGAATTTTGAGA     |
| <i>IL-1<math>\beta</math></i>   | F:TCGCAGCAGCACATCAACAAGAG<br>R:AGGTCCACGGGAAAGACACAGG    |
| <i>ZO-1</i>                     | F:CTGGTGAAGTCTCGGAAAAATG<br>R:CATCTCTTGCTGCCAAACTATC     |
| <i>Claudin-1</i>                | F:AGATACAGTGCAAAGTCTTCGA<br>R:CAGGATGCCAATTACCATCAAG     |
| <i>Occludin</i>                 | F:TGCTTCATCGCTTCCTTAGTAA<br>R:GGGTTCACTCCCATTATGTACA     |
| <i>C/EBP<math>\alpha</math></i> | R:GGTTTCGGGTCGCTGGAT<br>F:CGGCCTGACTCCCTCATCT            |
| <i>STAT5</i>                    | R:GCCACTGTTCTCTGGGACAATG<br>F:ACACGAGGTTCTCCTTGGTCAG     |
| <i>PPAR-<math>\gamma</math></i> | R:CTGTGGGCTCACTGTTCT<br>F:AGGGCTCATCCTGTCTTT             |
| <i>Adiponnetin</i>              | R:ATGCCTATAACACCAATACC<br>F:TCACTTCTAAGACAGCCAAT         |
| <i>ACBP</i>                     | R:AGGAGCACTACACTGACCTGA<br>F:GGTTGGTCTCTCCAAGCATCA       |

F: Forward; R: Reverse
